# Supplementary material
Source: publisher figshare collection journal article supplement (https://tandf.figshare.com/articles/dataset/_/9206402)
Supplement: Supplementary file 1 [file 2 › supplemental_materials_course_syllabus.pdf]

# GEOL 455: Field Methods in Geology (4 credits)

## Class Syllabus and Schedule – Spring Mini 4/Summer 2019

**Instructor:** Nick Lang, Ph.D.

**Email:** nlang@mercyhurst.edu

**Textbook:** *Geological Field Techniques*, Angela L. Coe, editor; published by Wiley-Blackwell

**Pre-requisites:** Geol 100/101, though coursework in at least three other geology courses numbered 200 or higher (preferably including Structural Geology) is strongly recommended. Junior or senior standing is also strongly recommended.

**Office hours (pre-trip):** MWF 11 am – 1 pm & by appointment (Zurn 205B)

**Office hours (during trip):** Each evening in the dining hall from 8-10 pm

**TA:** Elizabeth (Lizzie) Patnode (epatnode@mercyhurst.edu); Lizzie is located in the Registrar's Office

**Students with a disability:** In keeping with college policy, any student with a disability who needs academic accommodations must call the Learning Differences Program secretary at 824-3017, to arrange a confidential appointment with the director of the Learning Differences Program as soon as possible.

### Course description and introduction:

This is a field-based class that serves as a capstone course for the bachelor's degrees in *Geology* and *Environmental Science – Geology Field Studies*. As such, it is meant to tie together many of the concepts and techniques you have learned in your other geology courses by applying them outside in the field in a hands-on manner. Many of the concepts and techniques we address in this course you have already addressed in your geology curriculum (with an emphasis on the Erie, PA region), but now you are applying them in a totally different area. Further, we will be learning to operate independently as geologists in the field by using various geologic techniques (e.g., geologic mapping and describing sections) and instruments (e.g., Brunton compasses and GPS) to collect geologic data and answer geologic questions pertaining to igneous, metamorphic, and sedimentary-related (including Quaternary) processes.

The overall course-level learning objectives for this course is: *Using appropriate tools and methods, you will be able to place geologic materials observed and described in the field into their proper geologic context.* The overall course objective can be broken into the smaller objectives summarized in the table below (how these objectives will be assessed is also listed below) – After completing this course, students will be able to:

| Learning Objectives                                                                                                                                                                                                                                                                                                                                                                                                                                                                                                                          | Assessment                                                          |
|----------------------------------------------------------------------------------------------------------------------------------------------------------------------------------------------------------------------------------------------------------------------------------------------------------------------------------------------------------------------------------------------------------------------------------------------------------------------------------------------------------------------------------------------|---------------------------------------------------------------------|
| 1) Use appropriate measuring devices to accurately <i>analyze</i> a section of geologic-related materials<br><br>2) Accurately <i>select</i> geologic-related samples to be collected and labeled<br><br>3) Use a Brunton compass, an appropriate base map, and other appropriate field tools, to correctly <i>construct and analyze</i> a geologic map and cross-section of a geologic terrain<br><br>4) Use collected geologic information to <i>produce</i> a professional report accurately summarizing the geologic history of a region | -In class projects completed individually and evaluated by a rubric |

**Course set-up, contact hours, and expectations:**

This is a field-based class that takes place in and around the Mojave Desert region in SE California, USA. The field portion of the course runs from May 15<sup>th</sup> to May 31<sup>st</sup> 2019. We will be based at the Zzyzx research station where we will be staying in dorm rooms and making use of their dining hall and other facilities; this facility is run by the California State University system and you can read more about it at:

<https://nsm.fullerton.edu/dsc/>

Each day will begin early in the am (7 am) in the dining hall with breakfast; you are to obtain your lunch for the day at the same time – make sure to also fill up on water before heading out in the field. It will be very hot during the day (temps potentially getting up to the 80s and 90s F; nights may be slightly chilly though with temps potentially dropping into the 50s (maybe lower?), so be prepared for these varied temperature – as well as weather – conditions). We will be driving out to our various field sites as soon as we can and will be out in the field until ~4:30 pm depending upon the length of our drive and the day's temperatures. At that time, we will head back to Zzyzx for some downtime and dinner; dinner is typically at 7 pm.

Starting at about 8 pm each evening, I will be in the dining hall for office hours until about 10 pm; your TA will be in and around the dining hall during this time as well. You are not expected to be in the dining hall during that time working on your projects, but it is strongly recommended you spend at least some time each evening working on your projects. The more time you spend each evening working on your projects, the easier each following day will be and the easier it will be to meet each project deadline. If you need to meet with me regarding questions on your projects, please take advantage of my presence – these will serve as my 'official' office hours where you are free to seek help on assignments and discuss ideas/hypotheses related to them.

There is nothing inherently easy about this course, so please do feel free to come talk with me and/or our course TA – you are not taking away from our time by asking us questions; you are the reason we are out here! As a general note, though, the more thought and effort you have put into an assignment and the more thoughtful your question, the more we will be able to help you. Questions such as, “I don't know what I am doing. What am I supposed to do here?” or “What am I supposed to do again for this assignment?” or even just showing me an answer on a sheet of paper and asking, “Does this look right?” do not constitute thoughtful questions and will not result in much help from us. An example of a thoughtful question that could help gain you a lot of insight is, “I am mapping the contact between these two formations, but I am confused as to what happens to it at this point. Could you help me find the contact or do you have any advice as to how to proceed?” OR “I have calculated the thickness of this unit to be 200 m, but I don't think that is correct. Could I double check my numbers with you?” Or even, “Could I double check my GPS coordinates with you to make sure I am in the correct places?” Please note the difference in these two approaches for asking questions. The first three examples stem from learned helplessness whereas the other examples are questions that result from some initial and real effort being placed into an assignment. The second set of examples are what you should try to follow.

In addition, Geol 455 is a Geology Major required course and the geology department has identified eight learning outcomes that all geology majors should meet before they earn their degree. The table below lists all eight departmental outcomes, identifies which outcomes will be assessed in this course, and provides the method(s) used to assess each outcome.

| <b>Geology Department Learning Outcomes</b>                                                                            | <b>Which outcomes are met in this course?</b> | <b>Method of assessment</b>                                         |
|------------------------------------------------------------------------------------------------------------------------|-----------------------------------------------|---------------------------------------------------------------------|
| 1) Explain the paradigms that shape current geologic thought (e.g., plate tectonics)                                   |                                               |                                                                     |
| 2) Explain the concept of geologic time and detail the geologic time scale for the Earth                               |                                               |                                                                     |
| 3) Explain the processes that have shaped and continue to shape the Earth                                              |                                               |                                                                     |
| 4) Identify significant geologic features on the Earth and place them into their appropriate geologic context          |                                               |                                                                     |
| 5) Identify common rocks, minerals, and fossils found on and inside the Earth using hand samples and thin sections     |                                               |                                                                     |
| 6) Associate common rocks, minerals, and fossils found on and inside the Earth with their appropriate geologic context |                                               |                                                                     |
| 7) Formulate and communicate an effective scientific argument through written and oral means                           |                                               |                                                                     |
| 8) Demonstrate the ability to organize and conduct geology-related field and laboratory work                           | <b>X</b>                                      | -In class projects completed individually and evaluated by a rubric |

### **Course Schedule:**

We will be meeting for 50 minutes one day each week during the mini 4 session (Wednesdays from 3-3:50 in Zurn 11). We will be using these class periods to help prepare us for what we will be experiencing in the field as well as to go over course expectations and any questions/concerns you may have. These meetings are required. Specific topics we will be covering as well as

assignments and readings you will need to do are listed below. Please make sure to do the stated reading PRIOR to that day's class.

*Pre-trip Meetings:*

| <b>Date</b> | <b>Topic</b>                                           | <b>Reading</b>                                                                                                                                                                                                                               | <b>Due</b>                                                                                                    |
|-------------|--------------------------------------------------------|----------------------------------------------------------------------------------------------------------------------------------------------------------------------------------------------------------------------------------------------|---------------------------------------------------------------------------------------------------------------|
| 3/13        | Course and field work overview                         | -                                                                                                                                                                                                                                            | Nothing                                                                                                       |
| 3/20        | Mojave Desert Overview<br>( <i>Quiz 1</i> )            | Sharp and Glazner: Geology of Eastern California (on Blackboard)<br><a href="http://mojavedesert.net/overview/">http://mojavedesert.net/overview/</a><br><a href="https://www.nps.gov/moja/index.htm">https://www.nps.gov/moja/index.htm</a> | Signed statement that you have read and understand the syllabus for this course (at the end of this syllabus) |
| 3/27        | Geology of our field areas and taking good field notes | Glazner et al., 2002 (skim)<br>Lang et al., 2011<br>Sharp and Glazner, Ch. 1-3<br>(all of these are on Blackboard)                                                                                                                           | Must have field notebooks by this class; bring them to class                                                  |
| 4/3         | Geology of our field areas                             | Glazner et al., 2002 (skim)<br>Lang et al., 2011<br>Sharp and Glazner, Ch. 1-3<br>(all of these are on Blackboard)                                                                                                                           | Sketch maps in notebooks of CA-NV-AZ region as well as SE CA highlighting major geographic features due       |
| 4/10        | Photography and more on field notes ( <i>Quiz 2</i> )  | Coe textbook: Ch. 3-4                                                                                                                                                                                                                        | Nothing                                                                                                       |
| 4/17        | Topographic map review/Remotely sensed imagery/Pace    | Scale and Topo reading<br>(all of these are on Blackboard)                                                                                                                                                                                   | McConnell's Mill map                                                                                          |
| 4/24        | Topographic map review/Remotely sensed imagery/Pace    | Scale and Topo reading<br>(all of these are on Blackboard)                                                                                                                                                                                   | Nothing                                                                                                       |
| 5/1         | Gear check/Reviewing travel plans ( <i>Quiz 3</i> )    | -                                                                                                                                                                                                                                            | Exercise logs (6/6)                                                                                           |

In addition, Saturday April 6<sup>th</sup> will be a field trip to McConnell's Mill State Park. We will depart campus at 9 am and be back to campus by 5 pm; we will depart from the front of the D'Angelo building and will be driving in university vans. Please bring food and water for yourself. We will be practicing use of Brunton compasses, GPS devices, briefly reviewing topographic maps, and performing an initial gear check (wear your hiking boots you intend to wear while in California!).

*In the field: (Readings are from the Coe textbook unless otherwise noted)*

| <b>Date</b> | <b>Topic</b>                                                                                      | <b>Reading</b>    | <b>Due</b>                             |
|-------------|---------------------------------------------------------------------------------------------------|-------------------|----------------------------------------|
| 5/15        | Evening – Meet in Las Vegas/Field prep                                                            | -                 | Nothing                                |
| 5/16        | Keystone Thrust/Shoshone/Charlie Brown Highway                                                    | Ch. 3, 7, 8       | Field notebook check                   |
| 5/17        | Cima Volcanic Field                                                                               | Ch. 7, 10         | Questions from previous day            |
| 5/18        | Cima Volcanic Field (plus lava tube?)                                                             | Ch. 7, 10         | Nothing                                |
| 5/19        | Cima Volcanic Field                                                                               | Ch. 7, 10         | Nothing                                |
| 5/20        | Kelso Dunes (am) and China Ranch (pm)<br>(I encourage you to try the date shakes at China Ranch!) | Ch. 6             | Cima assignment                        |
| 5/21        | Mannix Lake (no formal assignment)                                                                | Ch. 6             | Nothing                                |
| 5/22        | Mojave Desert Trip, part 1<br>(Oatman, Arizona?) (no formal assignment)                           | Lang et al., 2008 | Kelso and China Ranch assignment       |
| 5/23        | Marble Mountains/Granite Mountains                                                                | Ch. 6-7           | Field notebook check                   |
| 5/24        | Marble Mountains                                                                                  | Ch. 6-7           | Nothing                                |
| 5/25        | Mojave Desert Trip, part 2 (Blackhawk landslide?)<br>(no formal assignment)                       | -                 | Nothing                                |
| 5/26        | Rainbow Basin                                                                                     | Ch. 10            | Nothing                                |
| 5/27        | Rainbow Basin                                                                                     | Ch. 10            | Marble/Granite assignment              |
| 5/28        | Rainbow Basin                                                                                     | Ch. 10            | Nothing                                |
| 5/29        | Rainbow Basin                                                                                     | Ch. 10            | Field notebook check                   |
| 5/30        | Death Valley Field Trip (no formal assignment)                                                    | -                 | Nothing<br>(Final assignment due 6/17) |

We will do our best to follow the schedule listed above, but may need to make modifications, which will be announced each evening or in the morning at breakfast. This means it would be good if you were around the dining hall for at least some portion of each evening and at breakfast each morning. You are responsible for all announcements and material provided during this time. All reading listed under the Reading column will be from the Coe textbook unless otherwise noted. Readings from the pre-trip meetings will also be useful for each assignment.

### **Grading and Coursework**

*Course grading (both pre-trip and in the field):*

| <u>Coursework</u>                                        | <u>Points</u>     |
|----------------------------------------------------------|-------------------|
| Field assignments                                        | 200               |
| Final assignment (due after course is completed by 6/17) | 100               |
| Field notebooks                                          | 50                |
| Class participation (pre-field)                          | 25                |
| Class participation (field)                              | 50                |
| Pre-field assignments/quizzes                            | 50                |
| Exercise log                                             | 25                |
| <b><i>TOTAL</i></b>                                      | <b><i>500</i></b> |

#### Course Grade Breakdown

(by % of points earned)

93%+ = A  
 88-92% = B+  
 80-87% = B  
 77-79% = C+  
 70-76% = C  
 67-69% = D+  
 60-66% = D  
 <60% = F

### **Course Policies**

#### ***Assignments and grading:***

*Pre-trip:* All pre-trip assignments are geared towards helping you prepare for being in the field for 2+ weeks. These include:

- a) sketch-maps in your field notebooks of the region we will be working in
- b) a practice geologic map of McConnell's Mill State Park
- c) an exercise log

I will explain what I am looking for in the sketch maps in class. The McConnell's Mill map will be constructed as part of a Saturday field trip on April 6<sup>th</sup>.

For the exercise log, you are required to spend at least 30 minutes 3 times a week (a minimum of 90 minutes total each week – NOT 90 minutes in one going) doing something physically active. The exact activity you do is up to you, but I strongly encourage you to perform some cardio-related workouts (e.g., running, walking, etc...). The more serious you take the exercise log, the better you will do while in the field in California. We will be walking multiple miles a day over uneven and sometimes quite rugged terrain in high temperatures, so getting in some sort of shape before we are out in California will only do you good. You are to fill out the form I provide you

and you are on the honor system that you are actually doing the activities you record in your log. The log is due to me by 5 pm on Monday, May 6<sup>th</sup>.

Note that you also have three quizzes for this first part of the course. Quiz values will range from 5-10 points and are geared to making sure you are taking course content seriously. Quizzes are not cumulative and will only cover content since the previous quiz; questions will range from multiple choice to short answer.

*Trip:* All assignments for the California portion of this course are field-based projects. You may work together on these projects, but you must each turn in your own work. Due dates for each assignment will be listed on the assignment, but are also provided in the schedule above. Assignments will be due by the end of breakfast on the stated due date. There will be a file folder with the name of the assignment written on it in the dining hall next to our supply boxes (this will be near the door to the patio where we eat). Please place your assignment in that file folder and I will collect them before we leave for the day. All supplies you may need to complete and turn in an assignment (stapler, paper clips, tracing paper, colored pencils, background reading) will be in the supply boxes. Please make use of these supplies – we brought them for you!

Your participation in this course will also be evaluated. Grading for that part of the course will involve your attendance, attitude, and preparation for each field day; a checklist of how I will grade you on this part of the class is provided on the course Blackboard page. The same goes for grading the pre-trip class participation except that will involve your preparedness for each weekly class meeting.

Final course grades will be tabulated after you turn in your final assignment, which I must have in my possession by Monday June 17. You may either drop your assignment off with me in my university office or mail it to me in the department; if you choose to mail it to me, it must arrive at Mercyhurst University by Monday June 17. Your final assignment will include your Rainbow Basin project, your field notebook, and the geologic history write-up that I handed out to you.

*Evening meetings:* I will be available each evening to meet with you about each of your assignments. The evenings are also great times to work on your projects – the more you work on them in the evening, the easier it will be to meet the deadlines for each assignment. These meetings are NOT mandated, though I do reserve the right to call a mandated meeting if needed.

*Laptops:* If you have a laptop, please bring it to field school. However, if you do not have a laptop, do not worry – we will make do without them. You may want to make use of Google Earth as well as online resources I have pointed out to you.

*Late work:* Assignments will routinely be due at breakfast time on the due date listed above in the class schedule and, similar to the ‘real world’, deadlines must be kept. Therefore, ANY ASSIGNMENT NOT TURNED BY THE ASSIGNED TIME IS LATE. This goes for all class assignments; any assignment that is late will lose 5 pts. every day that is late.

*Class disruptions:* You are all considered mature and legal adults who all deserve treatment with respect. Therefore, I expect you all to treat each other and myself with respect. This means that cell phones should be turned off or at least silenced during class (the exception being if you are using your phone as a GPS), you should not be disrupting your classmates with continual chatter and/or texting, and you should be at the van ready to head into the field by the designated time each morning and be at the van ready to head back to Zzyzx at the end of each day. I realize that

sometimes that there are the occasional occurrences where a student may be running late and I sympathize with that, but if you are not at the van by the time we are departing, you will be left behind for the day. Continual missing of class days will result in continual loss of points in the course and may result in failure of the course. Engaging in behavior deemed inappropriate, threatening, or offensive will result in loss of points in the course, but continual engagement in such behaviors will result in failure in the course and/or being dismissed from the course and sent back to Erie; if you are sent back to Erie for engaging in such behaviors, you will pay for the cost of the travel. Behaviors deemed inappropriate, threatening, or offensive include bullying (both physical and emotional), breaking or destroying personal and/or school property, violating local/state/federal laws, violating Cal State University and/or Mercyhurst policies, wandering away on your own or not letting anyone know where you are, and threatening violence.

***Desert Studies Center (DSC) policy (this is actually from them, not me, though I do strongly support what they say...):*** Typically, guests from several groups share the DSC at one time, operating on different schedules and with differing interests. While this can make your visit more interesting, it also makes certain codes of conduct and obligations necessary. Generally, **conduct suitable to a school campus is expected**. There is a strict quiet policy in and around dormitories after 10PM. Group leaders are required to arrive with or in advance of their group, check in with the DSC Manager, and arrange for a brief orientation and assignment of facilities with the group.

The DSC operates on a “self-housekeeping” basis; guests are required to follow the posted clean up procedures in their dorm rooms before departure and help keep dining and other common use areas clean during their stay, including any kitchen facilities they are permitted to use. This is a requirement. Please include time for clean up when planning your itinerary. Pets are not allowed at the DSC, and University and National Park Service regulations prohibit the possession of firearms. DSC buildings are a no smoking facility, however guests may smoke outdoors, away from the buildings, and use the butt receptacles provided.

The Desert Studies Center is located within the Mojave National Preserve, and encompasses several sensitive habitats, archaeological and historical sites, and a pond and spring containing Mojave Tui Chub, an endangered fish. Therefore, **please do not collect any material, plants or animals without prior authorization and do not wade or throw anything into the ponds**. The Manager reserves the right to remove any guest from the DSC whose conduct interferes with other guests or conflicts with the goals and purposes of the Desert Studies Center.

***Academic honesty:*** As I mentioned above, there is nothing inherently ‘easy’ about this course. Therefore, I don’t expect you to always get the right answer. However, I do expect your answers and your work to always be your own. I encourage you to work together on the assignments, but you always need to turn in your own work that is in your own words. Work that is turned in and seems to be an exact duplicate of someone else’s work constitutes plagiarism on both individuals regardless of whose work was the original. In addition, if you are using some external source such as your textbook, a magazine or journal article, or the internet to help you with your work, you **MUST CITE** that work. Not citing that work also constitutes plagiarism. A first offense of plagiarism in this class will earn you a 0 (zero) on that assignment. A second offense will constitute an automatic F in the course and possible referral to the Office of Academic Affairs. If you have questions or concerns regarding this policy, please feel free to talk to me at any time.

Finally and I can never stress this enough, but **IF YOU EVER HAVE ANY QUESTION ON ANYTHING REGARDING THIS COURSE, PLEASE ALWAYS FEEL FREE TO COME TALK TO ME ABOUT IT. THIS GOES FOR ANYTHING REGARDING ANYTHING; PLEASE ALWAYS FEEL FREE TO COME TALK TO ME ABOUT ANY ISSUES.**

**Certification of having read and understood the syllabus for Geol 455**

By signing below, you are certifying that you have read and understand the syllabus for this course (Geol 455 Field Methods in Geology).

Signature: \_\_\_\_\_

Please turn in a signed hard copy of this sheet (NOT the whole syllabus) to Dr. Lang in class on the date listed in the course schedule above (Wednesday, March 20).
